# Supplementary material for: Evaluating Gene Expression in C57BL/6J and DBA/2J Mouse Striatum Using RNA-Seq and Microarrays
Source: PLoS One. 2011 Mar 24;6(3):e17820. doi: 10.1371/journal.pone.0017820 (PMC3063777; doi:10.1371/journal.pone.0017820)
Supplement: Table S1 — Summary of read mapping statistics. Shown are the statistics in terms of reads for each lane of each flowcell (batch). The strain column references whether the sample was derived from the C57BL6/J (B6) or DBA2/J (D2) inbred strain of mouse. Total reads refers to the total number of generated reads for each lane. The remaining columns reference whether the read was uniquely placed to a location in the genome (Uniquely mapped), whether it mapped to more than one location (Multi-mapped) or whether it failed to map (Non-mapped). All realignments were performed using Bowtie [26]. (XLS) [file pone.0017820.s006.xls]

## Sheet: Table S1
Table S1
lane	strain	batch	Total reads	Uniquely mapped	Multi-mapped	Non-mapped
1	D2	4	16661510	11629582	1725588	3306340
2	D2	4	20020570	13854874	2120597	4045099
3	D2	4	15630897	10632227	1542513	3456157
5	D2	4	15756299	10858671	1618763	3278865
6	B6	4	21844582	14896202	2248105	4700275
7	B6	4	21448228	14458742	2417275	4572211
8	B6	4	17452559	12173362	1680598	3598599
1	B6	6	15369958	9324172	1945714	4100072
2	B6	6	13974202	8498797	1842604	3632801
3	B6	6	14831350	9384847	2063792	3382711
5	B6	6	17477948	11322385	2425997	3729566
6	D2	6	21384901	14000412	3003777	4380712
7	D2	6	16440729	10561959	2367522	3511248
8	D2	6	18666299	12249561	2644341	3772397
1	B6	7	27742742	19029170	3657694	5055878
2	B6	7	28904421	19593272	3844745	5466404
3	B6	7	31437071	20647511	4528434	6261126
5	D2	7	31936532	21121741	4034923	6779868
6	D2	7	31202901	21274386	3867224	6061291
7	D2	7	31953011	21610666	4148071	6194274
8	D2	7	30117036	20179289	3767201	6170546
