# Supplementary material for: Evaluating Gene Expression in C57BL/6J and DBA/2J Mouse Striatum Using RNA-Seq and Microarrays
Source: PLoS One. 2011 Mar 24;6(3):e17820. doi: 10.1371/journal.pone.0017820 (PMC3063777; doi:10.1371/journal.pone.0017820)
Supplement: Table S2 — Microarray data agreement within platform when one or more probesets or probes exist for a gene. Numbers in table indicate number of genes. Differentially expressed (DE) at q<0.01; fold change (FC); probeset refers to both probeset for Affymetrix or probe for Illumina microarray; same direction of fold change means that the same strain showed higher gene expression; ‘some’ means at least one. (XLS) [file pone.0017820.s007.xls]

## Sheet: Table S2
Table S2
	Affymetrix	Illumina
Total DE	1650	869
All DE and all have same direction of FC	142	38
All DE but they disagree on direction of FC	28	3
Some DE with same direction FC and some not DE	573	236
Some DE but they disagree on direction of FC and some not DE	18	3
Only one probeset for this gene and it is DE	889	589
